# Supplementary material for: Mesenchymal Stem Cells Reduce Murine Atherosclerosis Development
Source: PubMed Central journal article supplement (PMC4614841; doi:10.1038/srep15559), 2015-10-22
Supplement: srep15559-s1.pdf [file srep15559-s1.pdf]

# **Supplementary Information**

## **Mesenchymal Stem Cells Reduce Murine Atherosclerosis Development**

**Frodermann V, van Duijn J, van Pel M, van Santbrink PJ, Bot I,  
Kuiper J, de Jager SCA**

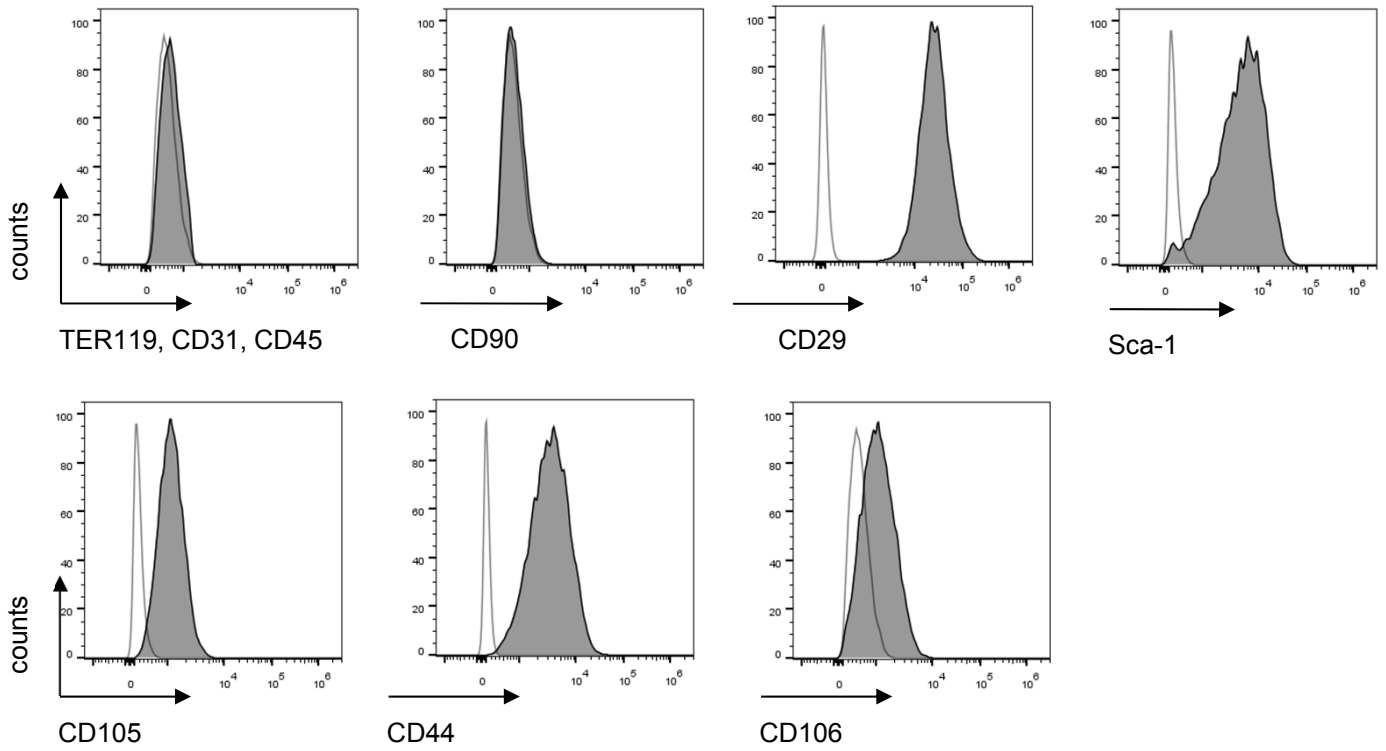

**Supplementary Figure 1. Phenotype of MSCs.** MSCs were generated from the bone marrow of male C57BL/6 mice and the expression of surface markers was analyzed by flow cytometry. Representative histograms are shown.

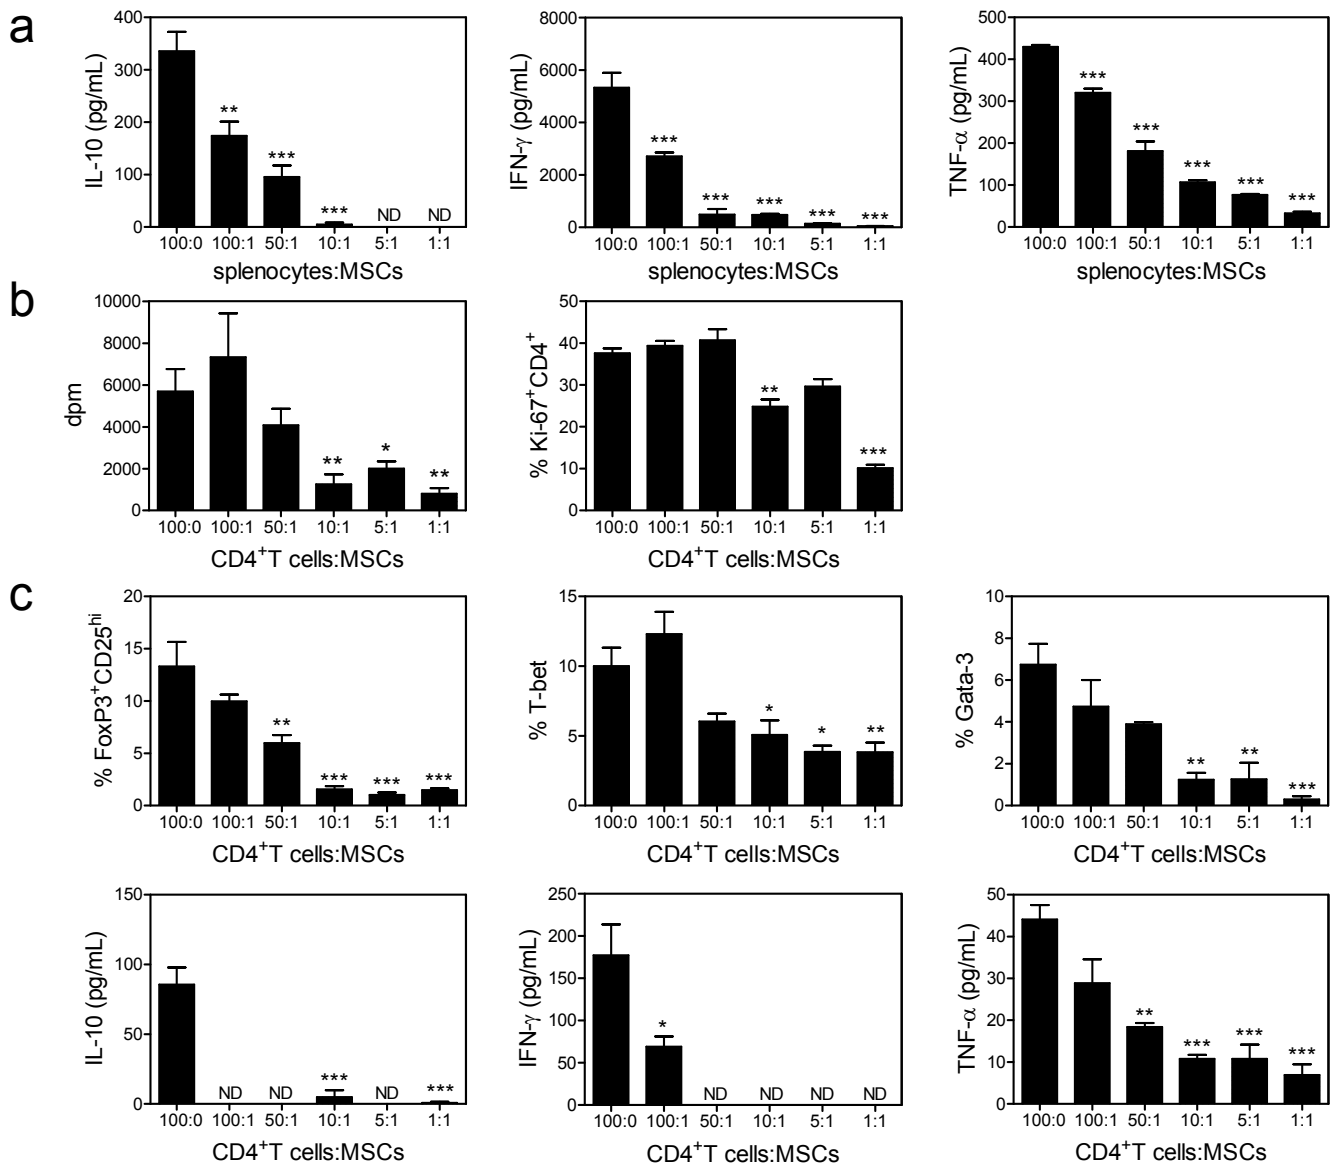

**Supplementary Figure 2. MSCs reduce T cell proliferation *in vitro*.** Total splenocytes and splenic CD4<sup>+</sup> T cells, both obtained from LDLr KO mice, were co-cultured with indicated ratios of MSCs in the presence of  $\alpha$ CD3/CD28 for 72 hours. Splenocyte and T cell numbers remained constant. a, Splenocytes showed reduced cytokine production in the presence of MSCs. b, Proliferation of CD4<sup>+</sup> T cells was assessed by <sup>3</sup>H-thymidine and by Ki-67 expression by flow cytometry. c, T cell subsets within CD4<sup>+</sup> T cells were determined by flow cytometry. Cytokine production was determined by ELISA. All values are expressed as mean $\pm$ SEM and representative of at least two independent experiments done in triplicate. \* P<0.05, \*\* P<0.01, \*\*\* P<0.001. ND defines not determined.

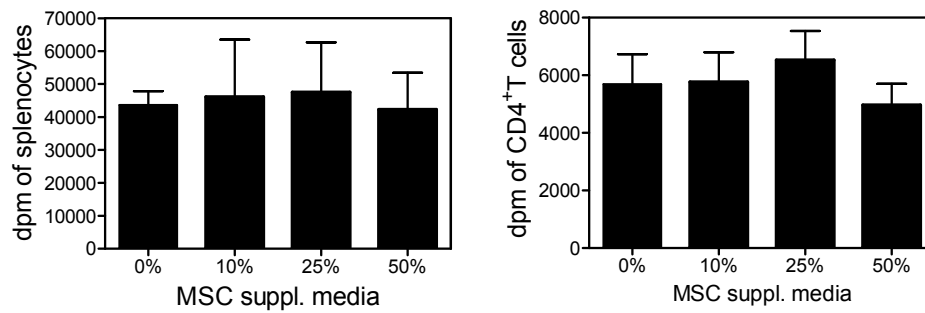

**Supplementary Figure 3. MSC supernatant does not affect T cell proliferation.** Splenocytes and CD4<sup>+</sup> T cells obtained from LDLr KO mice were cultured in the presence of MSC culture supernatant at the indicated amount in the presence of  $\alpha$ CD3/28 for 72 hours. Proliferation was assessed by <sup>3</sup>H-thymidine incorporation. Splenocyte and T cell numbers remained constant. All values are expressed as mean $\pm$ SEM and representative of two independent experiments done in triplicate.

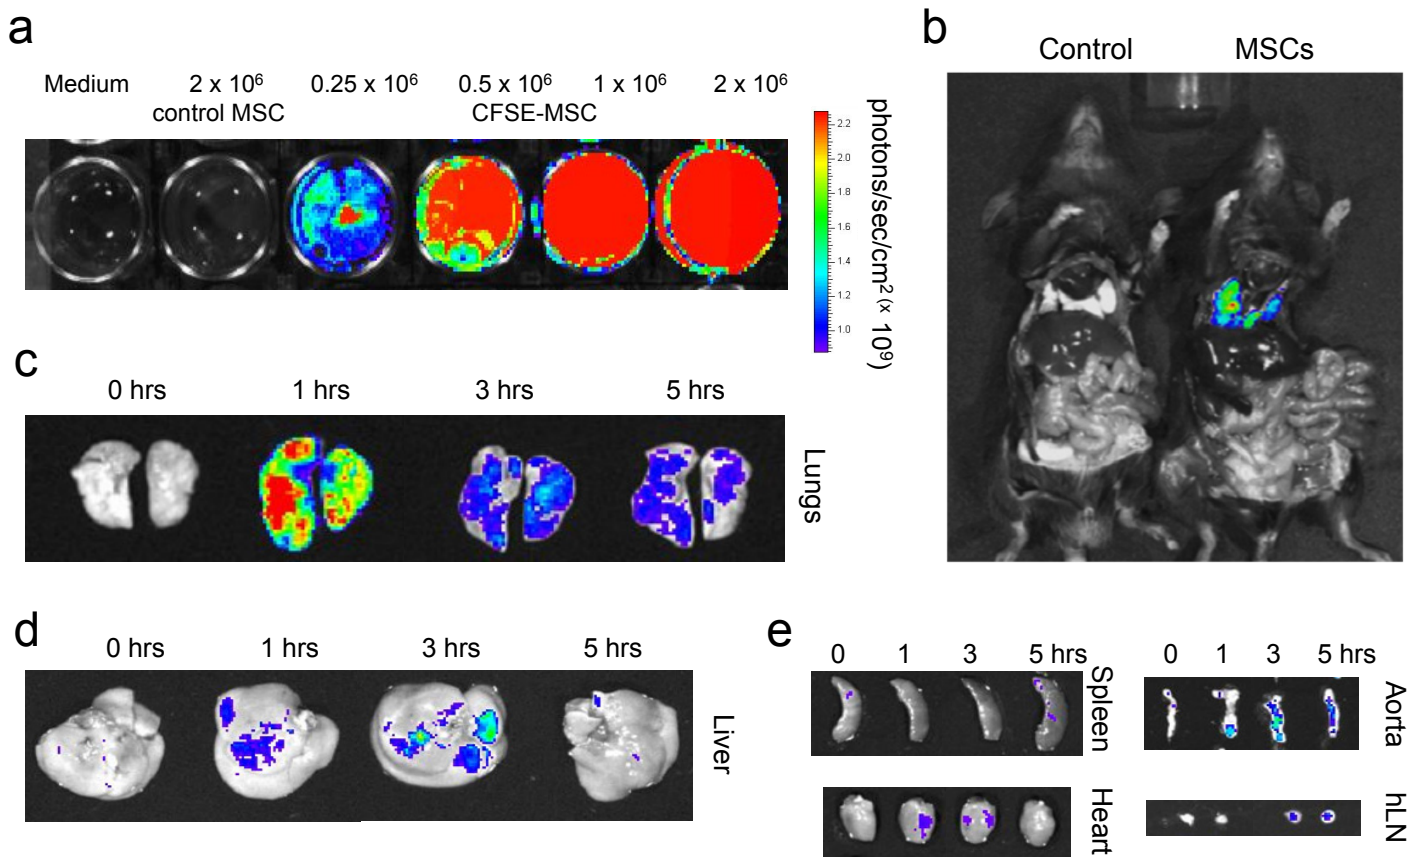

**Supplementary Figure 4. CFSE-labelled MSCs migrate preferentially to lung, liver, and the vasculature.** a, MSCs were labelled with 10 $\mu$ M CFSE. Signal intensity on IVIS correlates with amount of cultured CFSE<sup>+</sup> MSCs. Control MSCs indicates non-labelled MSCs. b, 15 min after *i.v.* injection of  $1 \times 10^6$  MSCs into LDLr KO, MSCs accumulate in the lung as determined by IVIS. c, MSC presence in the lung 1-5 hrs after injections into LDLr KO mice one week on WTD. d, liver and e, organ distribution of MSCs as determined by IVIS 1-5 hrs after injection of MSCs into LDLr KO mice one week on WTD.

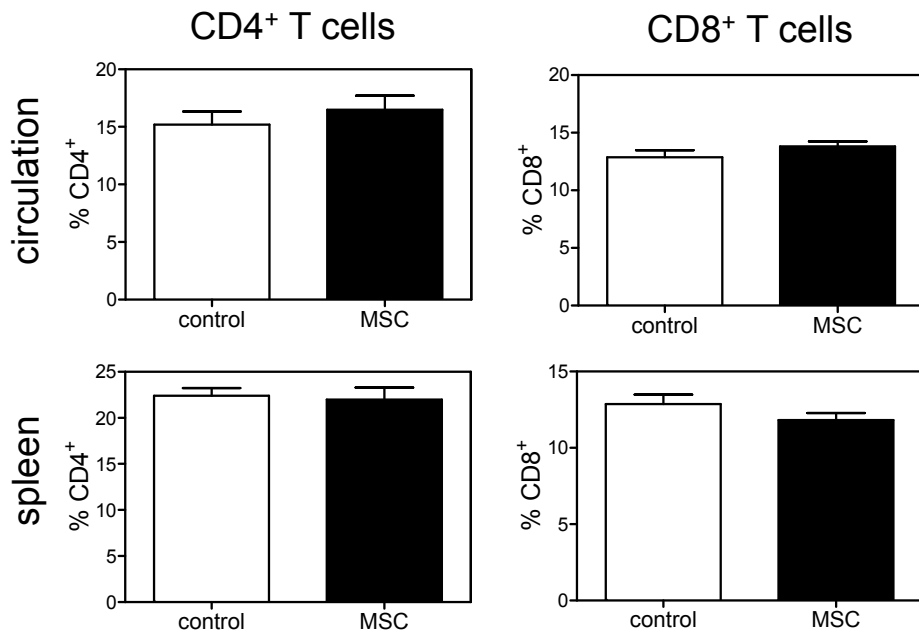

**Supplementary Figure 5. MSC-treatment does not affect absolute CD4<sup>+</sup> and CD8<sup>+</sup> T cell numbers *in vivo*.** Male LDLr KO mice received three *i.v.* injections of either PBS (control) or  $0.5 \times 10^6$  MSCs (MSC) and were then fed a Western-type diet (WTD) for eight weeks. CD4<sup>+</sup> and CD8<sup>+</sup> T cells percentages were determined in the circulation and the spleen by flow cytometry. All values are expressed as mean $\pm$ SEM and representative of six mice.

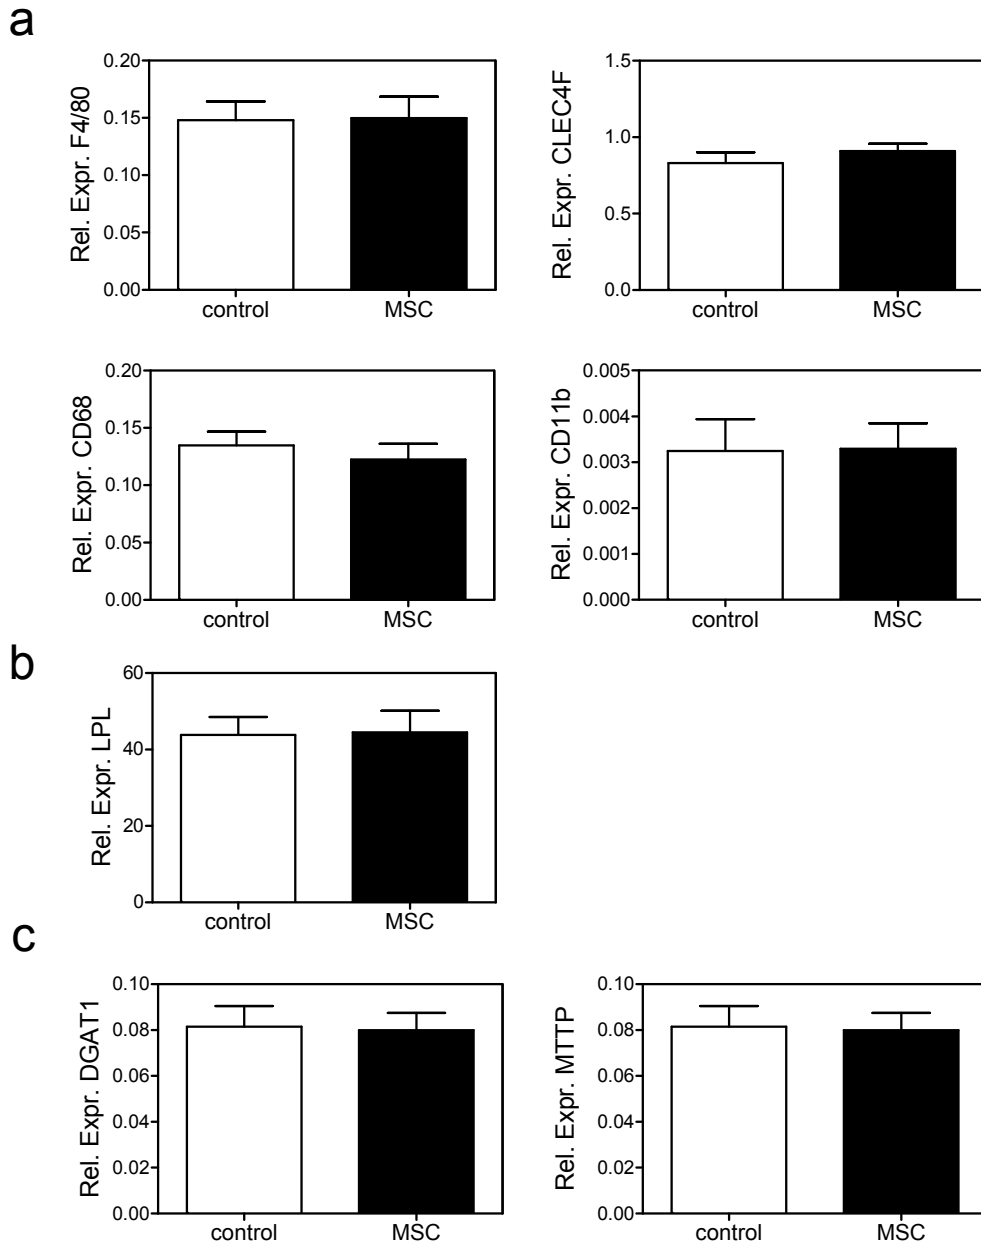

**Supplementary Figure 6. MSC treatment effect on mRNA expression in the liver.** a, Liver mRNA expression of Clec4f, F4/80, CD11b, and CD68 is shown. b, White adipose tissue mRNA expression of lipoprotein lipase (LPL) is shown. c, Liver mRNA expression of diglyceride acyltransferase 1 (DGAT1) and microsomal triglyceride transfer protein (MTTP), relative to the expression of three housekeeping genes (SDHA, HPRT and Rpl27). All values are expressed as mean $\pm$ SEM and representative of all mice. \*P<0.05, \*\*P<0.01, \*\*\*P<0.001.

**a**

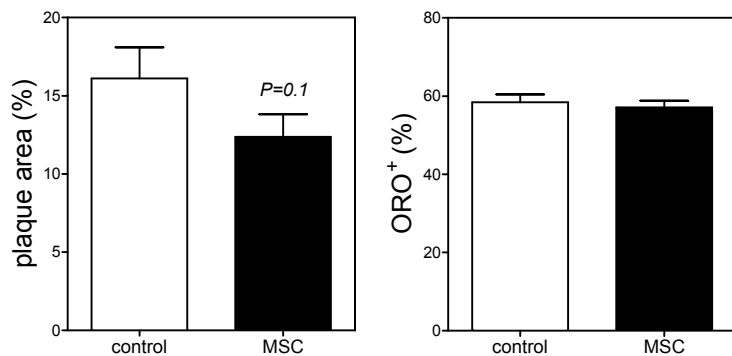

**b**

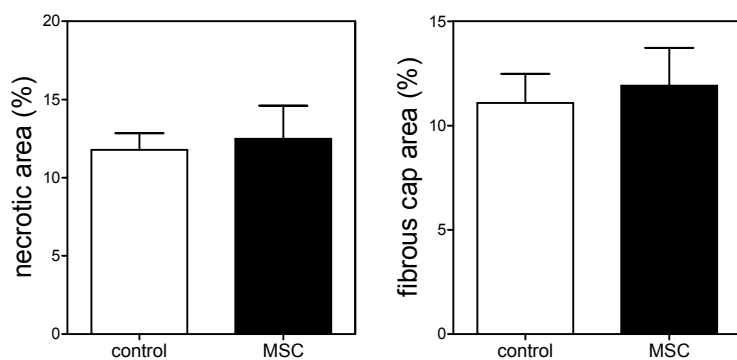

**Supplementary Figure 7. MSC treatment reduces lesion development but does not affect lesion composition.** a, The % plaque area was determined as total lesion area divided by total area of lumen and lesion. Lipid deposition was assessed by measuring Oil-red O positive area of lesions. b, necrotic area was determined as percentage acellular space of lesions and fibrous cap size as cap area divided by total lesion area.



| <i>Gene</i>                    | <i>Forward</i>             | <i>Reverse</i>             |
|--------------------------------|----------------------------|----------------------------|
| <b>ACC1</b>                    | AGAATCTCCTGGTGACAATGCTTATT | GCTCTGTGAGGATATTTAGCAGCTC  |
| <b>CD68</b>                    | TGCCTGACAAGGGACACTTCGGG    | GCGGGTGATGCAGAAGGCGATG     |
| <b>CLEC4F</b>                  | AGATCTGCAGGCGACCAAAGCC     | TCTGCGGATCAGCTGGAGAAC      |
| <b>DGAT1</b>                   | GGTGCCCTGACAGAGCAGAT       | CAGTAAGGCCACAGCTGCTG       |
| <b>F4/80</b>                   | TGCAGGGGGCTTTCATCTTCCTCA   | GGGAGCTAAGGTCAGTCTTCCTGGTG |
| <b>FASN</b>                    | GGCGGCACCTATGGCGAGG        | CTCCAGCAGTGTGCGGTGGTC      |
| <b>HPRT</b>                    | TACAGCCCCAAAATGGTTAAGG     | AGTCAAGGGCATATCCAACAAC     |
| <b>IL-6</b>                    | AGACAAAGCCAGAGTCCTTCAGAGA  | GGAGAGCATTGGAAATTGGGGTAGG  |
| <b>IL-10</b>                   | GGGTGAGAAGCTGAAGACCCTC     | TGGCCTTGAGACACCTTGCTC      |
| <b>LPL</b>                     | CCCCTAGACAACGTCCACCTC      | TGGGGGCTTCTGCATACTCAAA     |
| <b>MTTP</b>                    | TCTCACAGTACCCGTTCTTGGT     | GAGAGACATATCCCCTGCCTGT     |
| <b>RPL27</b>                   | CGCCAAGCGATCCAAGATCAAGTCC  | AGCTGGGTCCCTGAACACATCCTTG  |
| <b>Scd1</b>                    | TACTACAAGCCCGGCCTCC        | CAGCAGTACCAGGGCACCA        |
| <b>SDHA</b>                    | TATATGGTGCAGAAGCTCGGAAGG   | CCTGGATGGGCTTGGAGTAATCA    |
| <b>SREBP-1C</b>                | TCTGAGGAGGAGGGCAGGTTCCA    | GGAAGGCAGGGGGCAGATAGCA     |
| <b>SREBP-2</b>                 | TGAAGCTGGCCAATCAGAAAA      | ACATCACTGTCCACCAGACTGC     |
| <b>TNF-<math>\alpha</math></b> | GCCTCTTCTCATTCTGCTTGTG     | ATGATCTGAGTGTGAGGGTCTGG    |

**Supplementary Table 1. Primer Pairs used for qPCR analysis.** The relative expression of genes was determined relative to the average expression of three housekeeping genes: hypoxanthine-guanine phosphoribosyltransferase (HPRT), succinate dehydrogenase complex, Subunit A (SDHA) and ribosomal protein L27 (Rpl27). Abbreviations: ACC1, Acetyl-CoA carboxylase 1; DGAT1, diglyceride acyltransferase 1; FASN, fatty acid synthase; LPL, lipoprotein lipase; MTTP, microsomal triglyceride transfer protein; Scd1; stearoyl-CoA desaturase-1; SREBP-1c, sterol regulatory element-binding protein 1c; SREBP-2, sterol regulatory element-binding protein 2.
